# Supplementary material
Source: PubMed Central journal article supplement (PMC5560052)

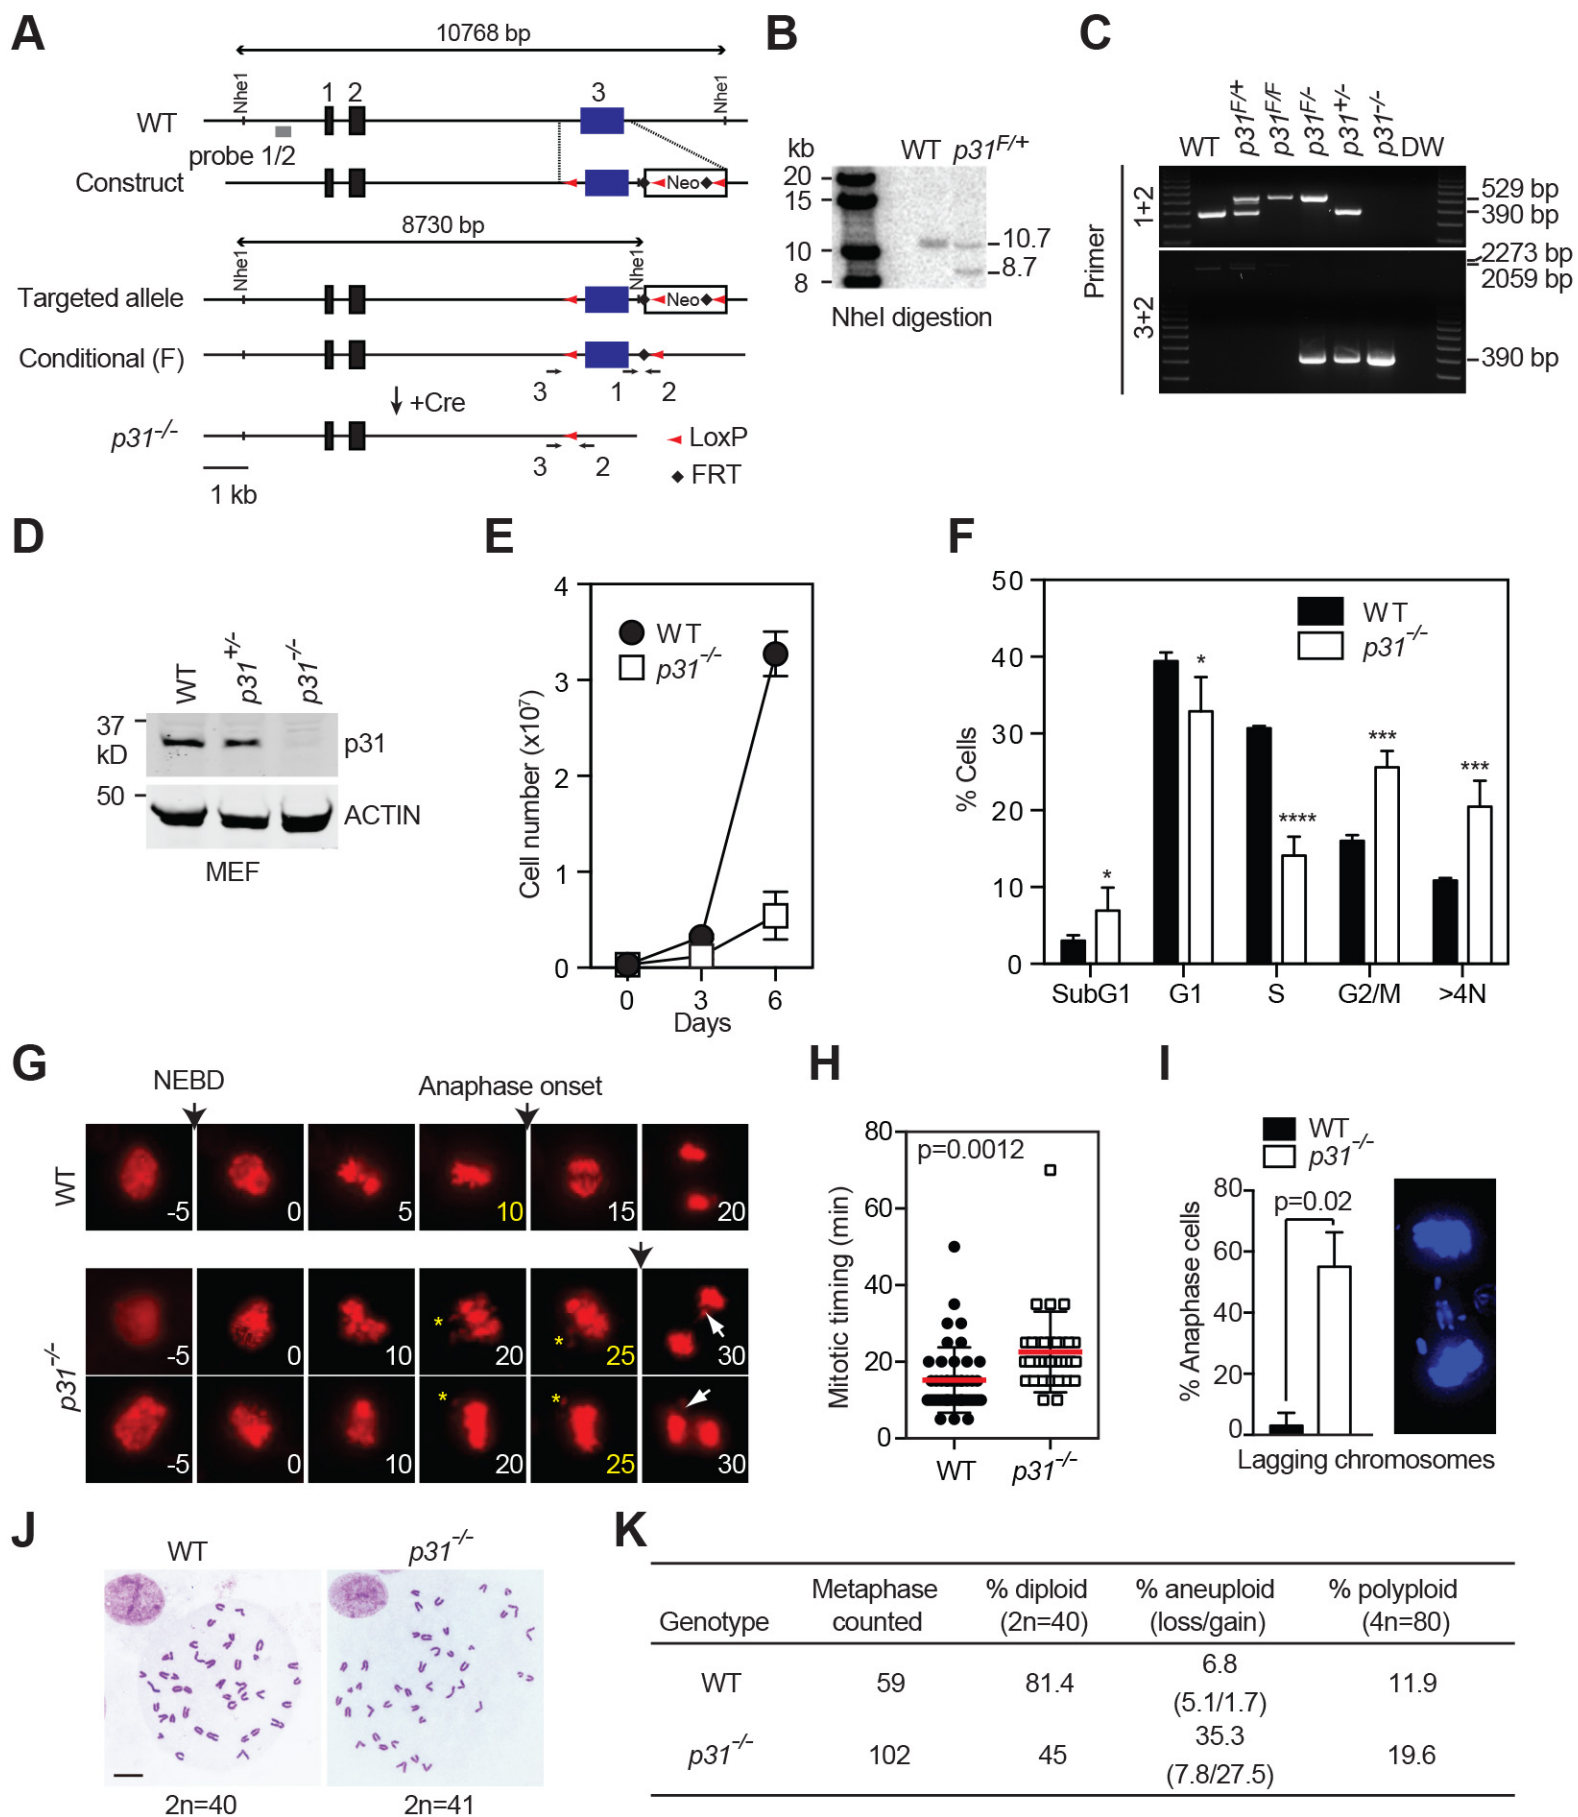

Figure S1

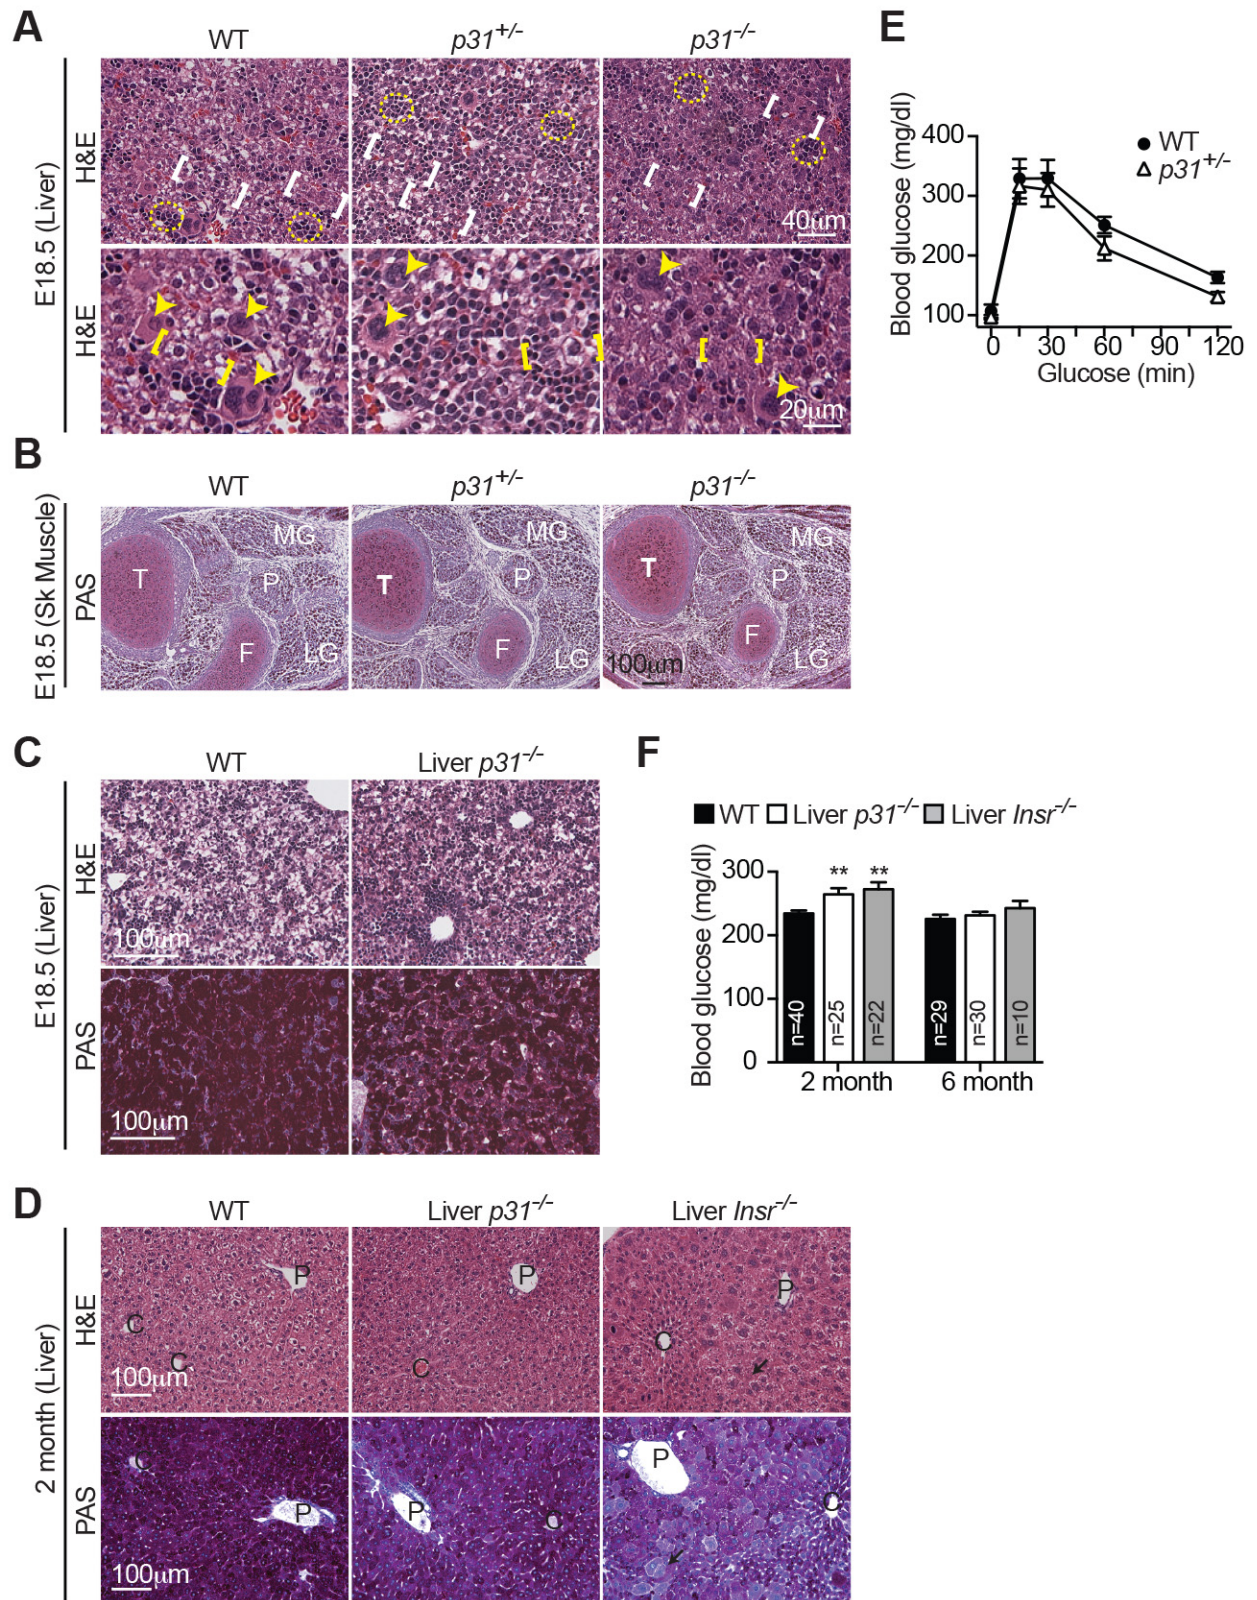

Figure S2



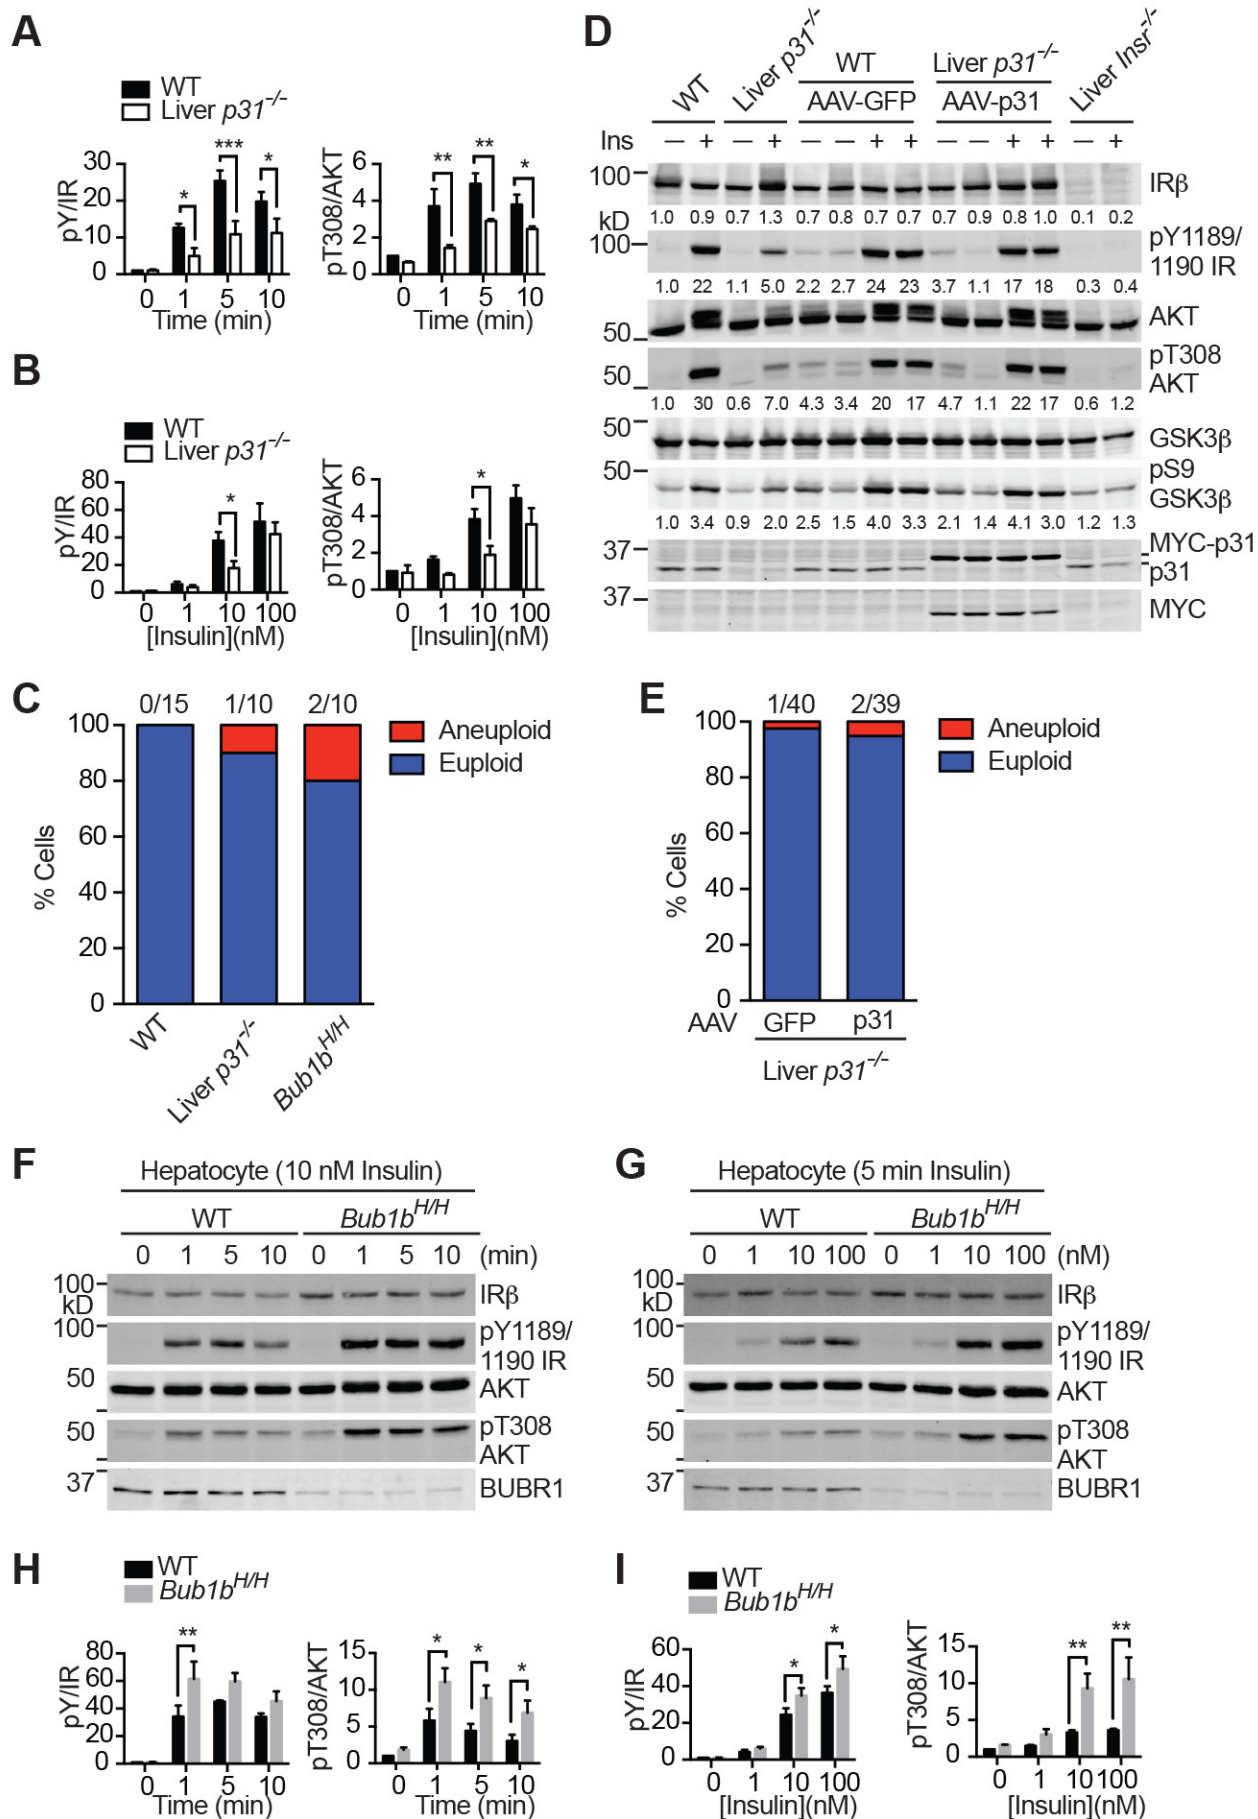

Figure S3

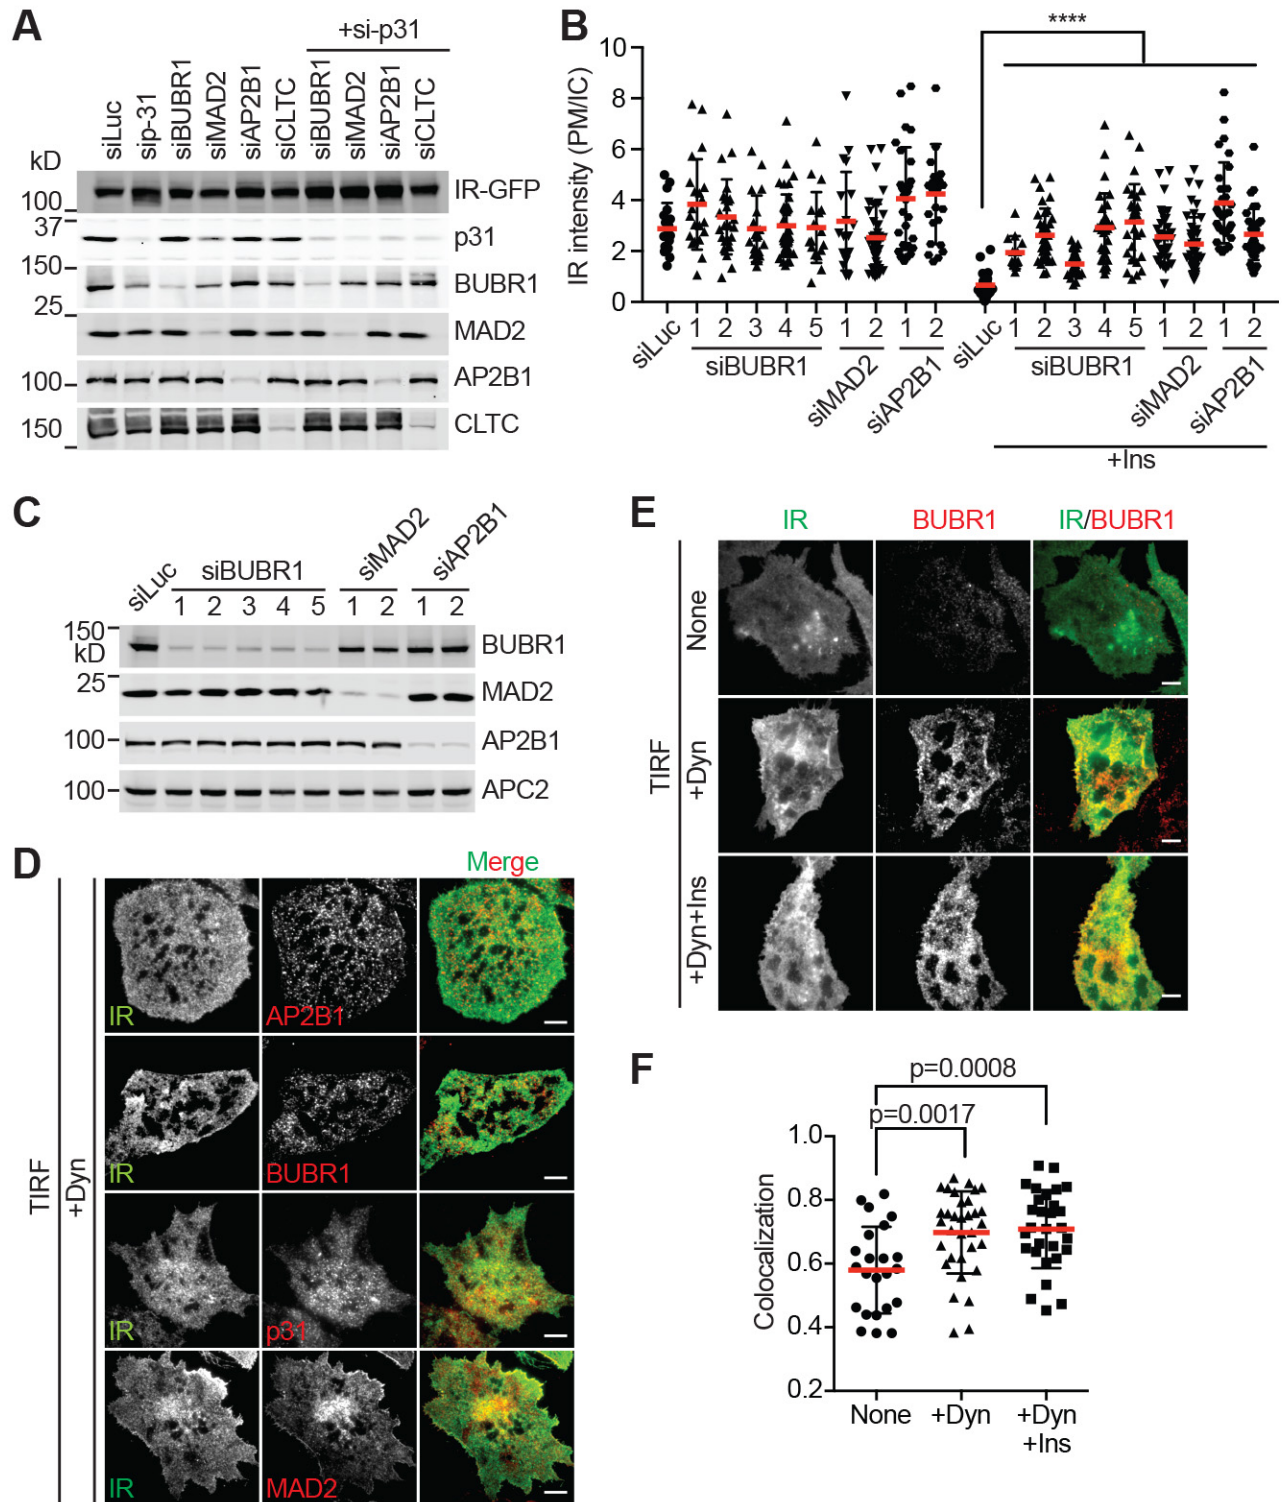

**Figure S4**

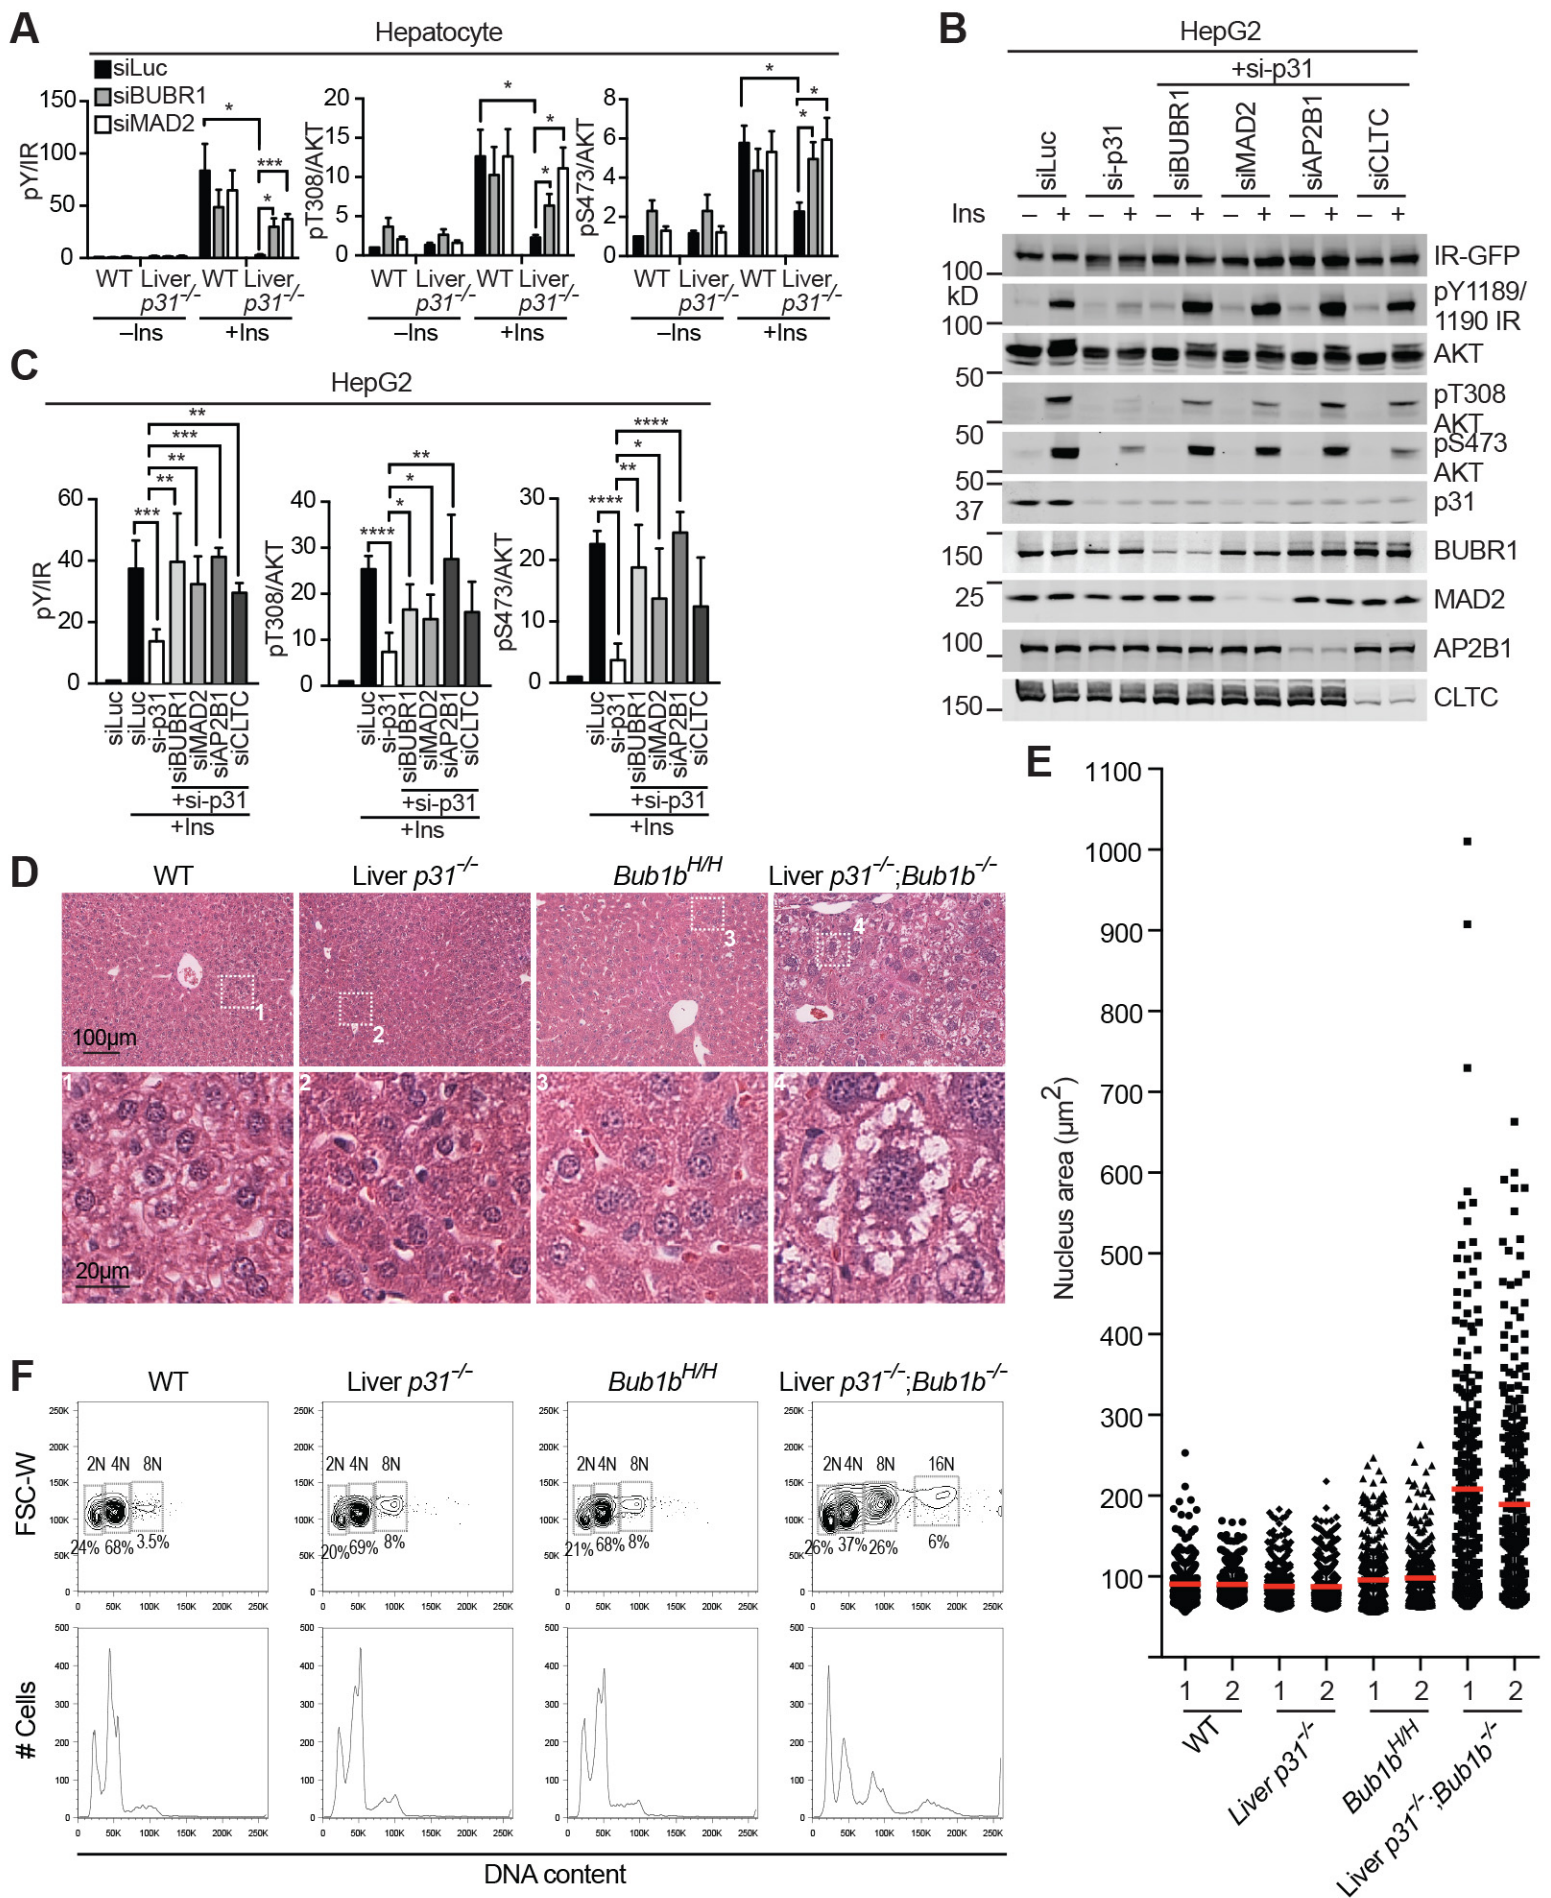

Figure S5



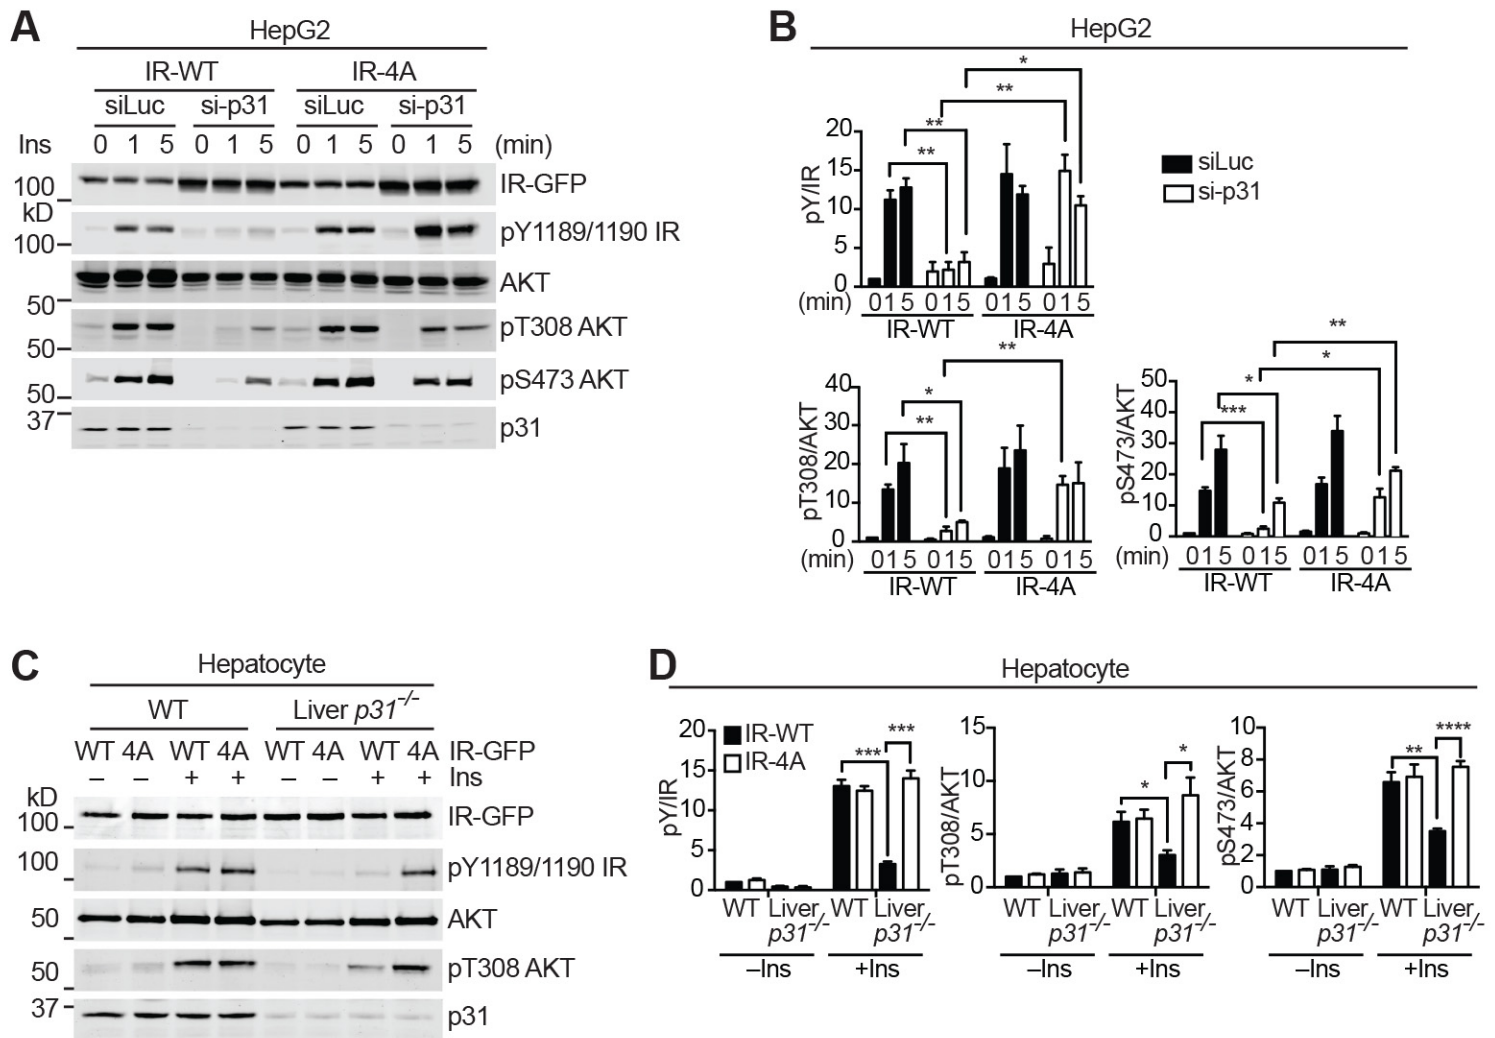

Figure S6

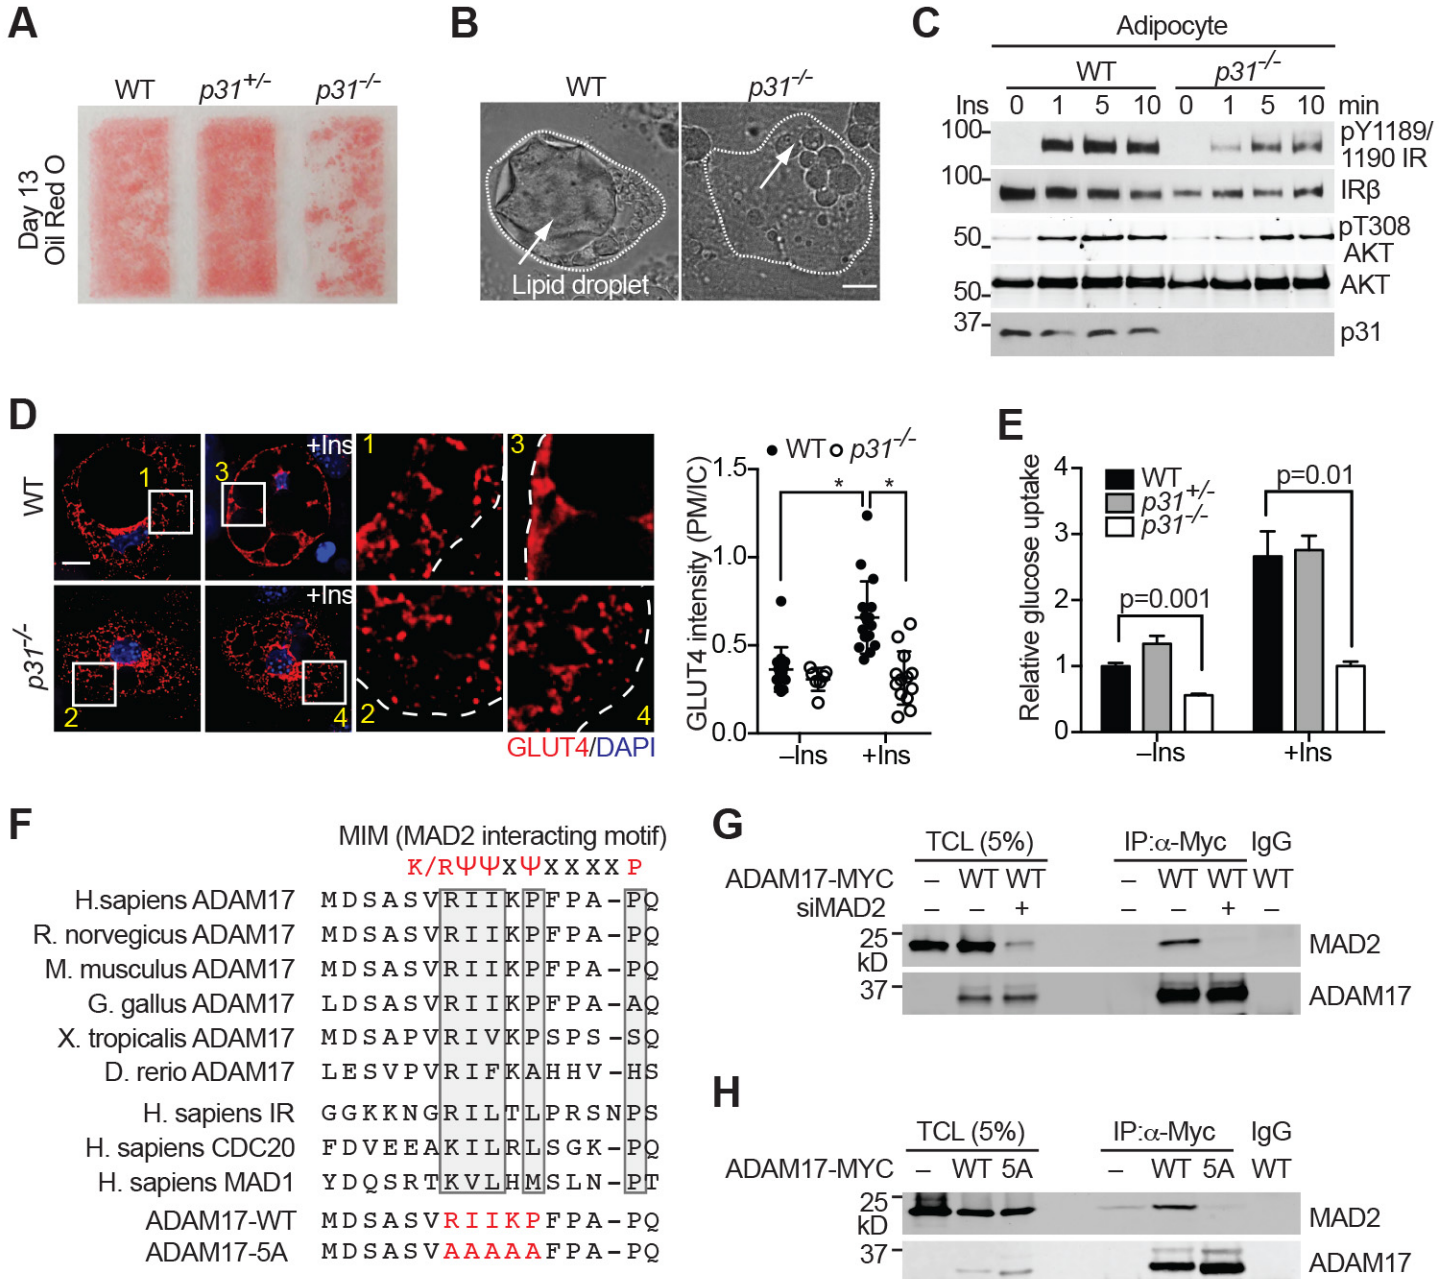

**Figure S7**

Supplement: NIHMS891233-supplement-supplement_1.pdf [file NIHMS891233-supplement-supplement_1.pdf]
